# Supplementary material for: Ordered mesoporous C/TiO2 composites as advanced sonocatalysts
Source: Royal Society of Chemistry journal article supplement (doi:10.1039/c4ta03455d), 2014-01-01
Supplement: c4ta03455d1.pdf [file c4ta03455d1.pdf]

## Supporting Information

### **Ordered mesoporous C/TiO<sub>2</sub> composites as advanced sonocatalysts**

Pengpeng Qiu<sup>1</sup>, Wei Li<sup>2</sup>, Kyounglim Kang<sup>1</sup>, Beomguk Park<sup>1</sup>, Wei Luo<sup>2</sup>, Dongyuan Zhao<sup>2\*</sup>, and  
Jeehyeong Khim<sup>1\*</sup>

<sup>1</sup>School of Civil Environmental and Architecture Engineering, Korea University, Seoul 136-701,  
Republic of Korea

<sup>2</sup>Laboratory of Advanced Materials and Department of Chemistry, Fudan University, Shanghai  
200433, China

E-mail: [hyeong@korea.ac.kr](mailto:hyeong@korea.ac.kr), [dyzhao@fudan.edu.cn](mailto:dyzhao@fudan.edu.cn)

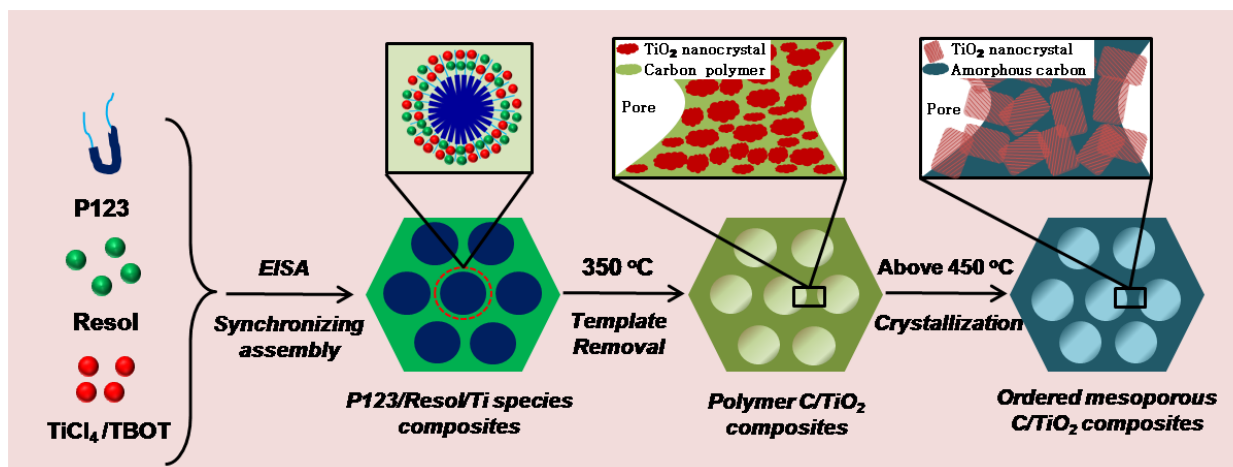

Fig. S1. Schematic illustration for the synthesis of ordered mesoporous C/TiO<sub>2</sub> composites.

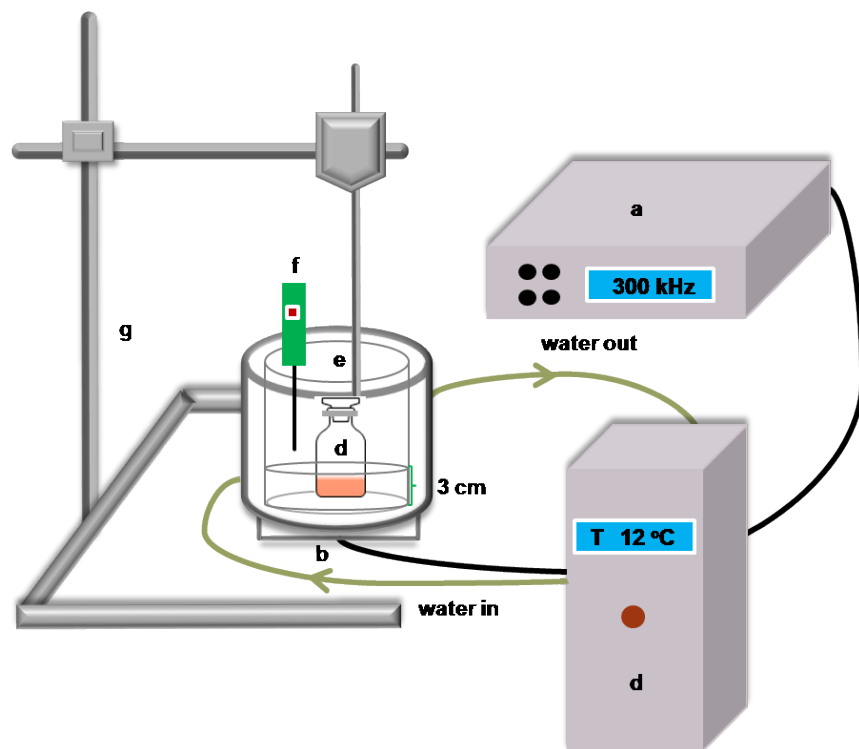

Fig. S2. Sonocatalytic degradation experimental setup. (a) amplifier, (b) transducer, (c) water jacket, (d) reactor, (e) container, (f) thermometer, (g) retort stand .

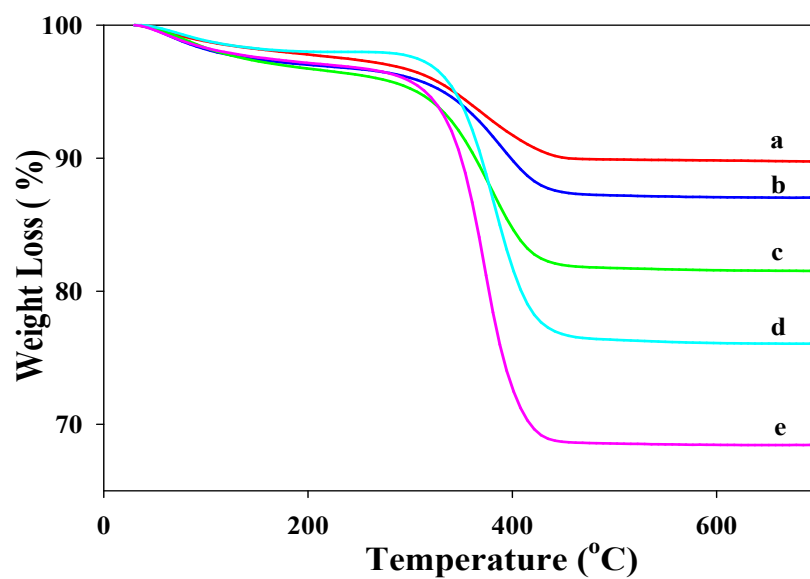

Fig. S3. TGA profiles of the ordered mesoporous C/TiO<sub>2</sub> composites with varied carbon content (5, 10, 15, 20, and 30 %). (a) 5C-95TiO<sub>2</sub>-450, (b) 10C-90TiO<sub>2</sub>-450, (c) 15C-85TiO<sub>2</sub>-450, (d) 20C-80TiO<sub>2</sub>-450, (e) 30C-70TiO<sub>2</sub>-450.

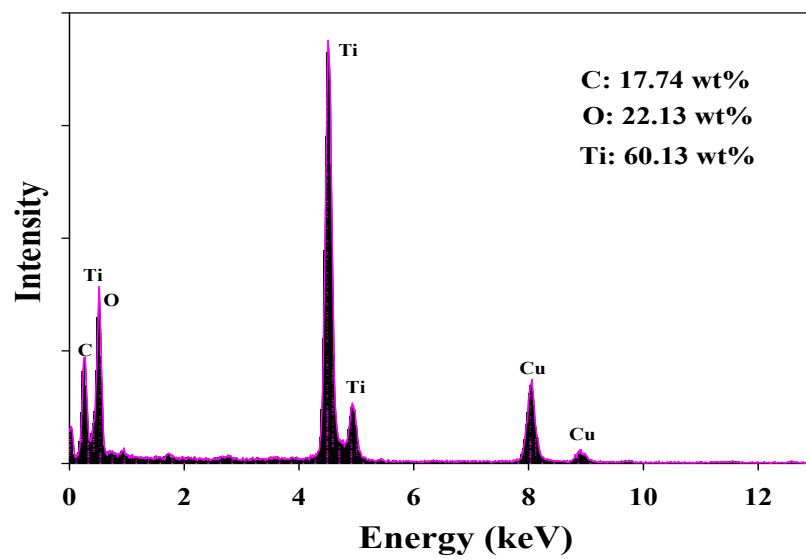

Fig. S4. EDX analysis of 15C-85TiO<sub>2</sub>-450 composites taken at Fig. 3B.

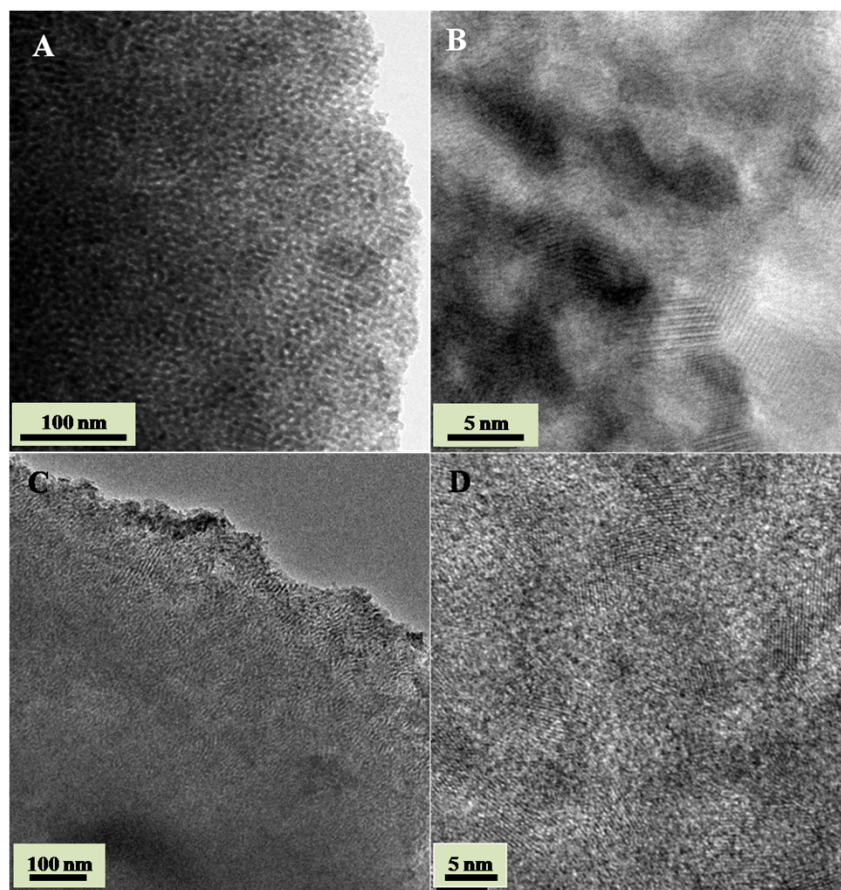

Fig. S5. TEM images (A) and HRTEM images (B) of the ordered mesoporous 10C-90TiO<sub>2</sub>-450 composites. TEM image (C) and HRTEM images (D) of the ordered mesoporous 15C-85TiO<sub>2</sub>-650 composites

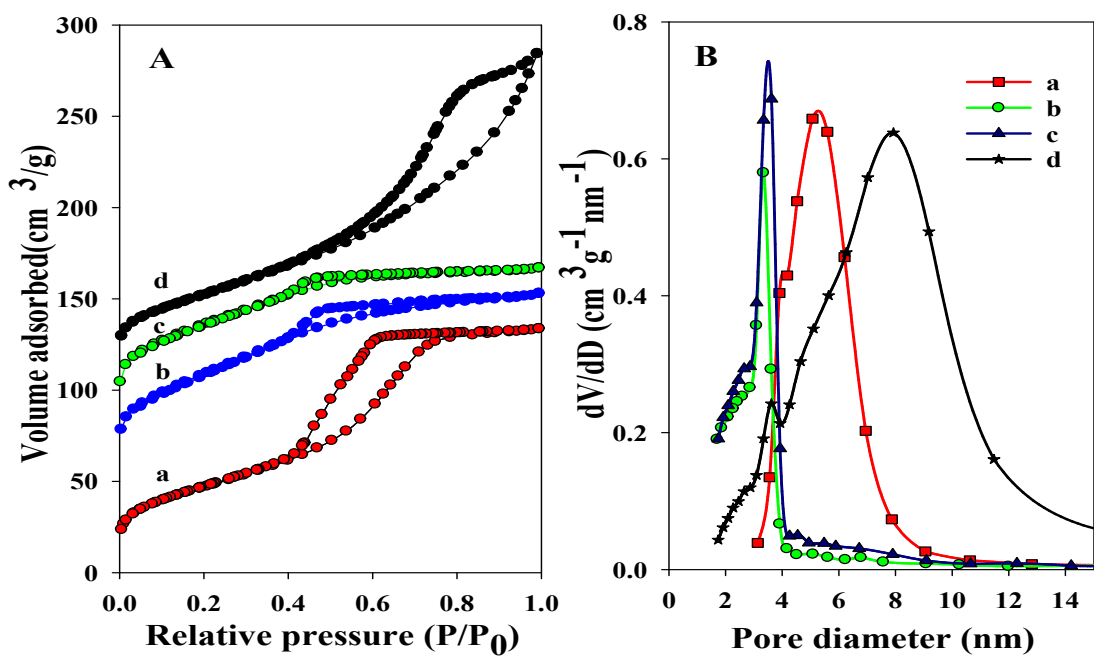

Fig. S6. (A) N<sub>2</sub> sorption isotherms and (B) pore-size distributions of the mesoporous C/TiO<sub>2</sub> composite 15C-85TiO<sub>2</sub> calcined at various temperatures (450, 550, 650, and 750 °C) in N<sub>2</sub>, (a) 15C-85TiO<sub>2</sub>-450, (b) 15C-85TiO<sub>2</sub>-550, (c) 15C-85TiO<sub>2</sub>-650, (d) 15C-85TiO<sub>2</sub>-750. For clear observation, 15C-85TiO<sub>2</sub>-550, 15C-85TiO<sub>2</sub>-650, and 15C-85TiO<sub>2</sub>-750 are shifted vertically by 40, 60, and 100 cm<sup>3</sup>/g, respectively.

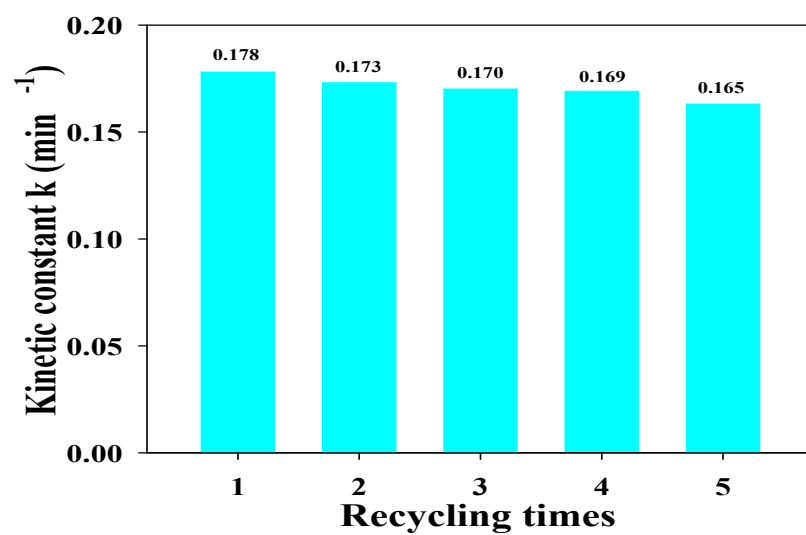

Fig. S7. Sonocatalytic reaction kinetic constant of the re-cycled 15C-85TiO<sub>2</sub>-450 at each cycle.



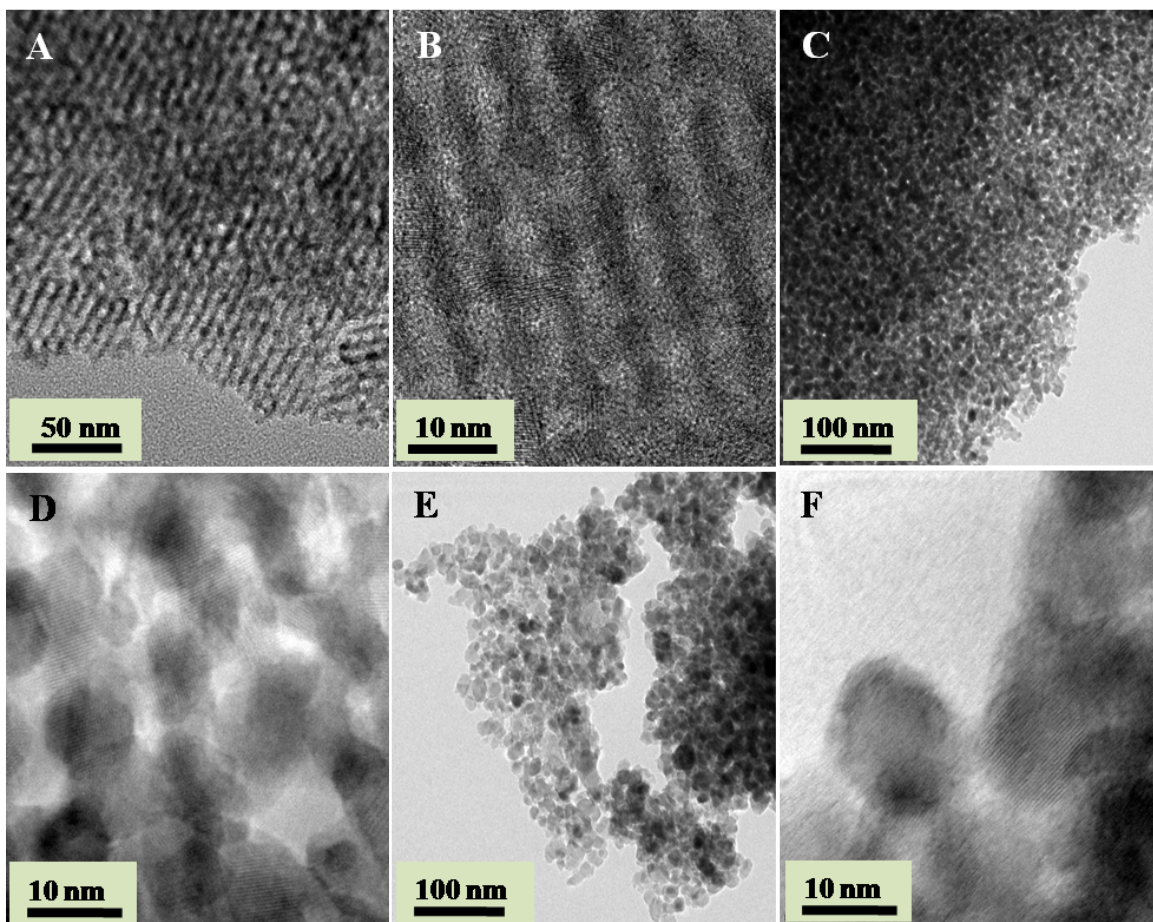

Fig. S8. TEM images (A) and HRTEM images (B) of the mesoporous C/TiO<sub>2</sub> composites 15C-85TiO<sub>2</sub>-450 after sonocatalytic reaction for 5 h. TEM images (C) and HRTEM images (D) of mesoporous titania before sonocatalytic reaction. TEM images (E) and HRTEM images (F) of mesoporous titania after sonocatalytic reaction for 5 h.
